# Supplementary material
Source: PubMed Central journal article supplement (PMC3985444)
Supplement: ci400460q_si_001.pdf [file ci400460q_si_001.pdf]

**Application of Quantitative Structure-Activity Relationship Models of 5-HT<sub>1A</sub> Receptor  
Binding to Virtual Screening Identifies Novel and Potent 5-HT<sub>1A</sub> Ligands**

Man Luo<sup>‡</sup>, Xiang Simon Wang<sup>†\*</sup>, Bryan L. Roth<sup>‡#</sup>, Alexander Golbraikh<sup>‡</sup>, and Alexander  
Tropsha<sup>‡\*</sup>

**Supplementary Materials**

**Table S1.** The number of screening compounds within different  $n_{\text{cutoff}}$  values for 5-HT<sub>1A</sub> binders virtual screening against 6 different types of chemical libraries.

| Screening libraries          | Number of cmpds | $n_{\text{cutoff}}$ | Cmpds in AD | Cmpds in AD (%) |
|------------------------------|-----------------|---------------------|-------------|-----------------|
| Prestwick                    | 1,552           | -0.5                | 209         | 13.5%           |
|                              |                 | 0                   | 304         | 19.6%           |
|                              |                 | 0.5                 | 458         | 29.5%           |
| World Drug Index             | 53,382          | -0.5                | 1334        | 2.5%            |
|                              |                 | 0                   | 3295        | 6.2%            |
|                              |                 | 0.5                 | 7371        | 13.8%           |
| TimTec GPCRTargeted Library  | 2,300           | -0.5                | 31          | 1.3%            |
|                              |                 | 0                   | 151         | 6.6%            |
|                              |                 | 0.5                 | 542         | 23.6%           |
| Asinex GPCR Targeted Library | 3,233           | -0.5                | 144         | 4.5%            |
|                              |                 | 0                   | 890         | 27.5%           |
|                              |                 | 0.5                 | 2279        | 70.5%           |
| TimTec Diversity Library     | 10,000          | -0.5                | 46          | 0.5%            |
|                              |                 | 0                   | 222         | 2.2%            |
|                              |                 | 0.5                 | 803         | 8.0%            |
| Asinex Diversity Library     | 5,072           | -0.5                | 39          | 0.8%            |
|                              |                 | 0                   | 267         | 5.3%            |
|                              |                 | 0.5                 | 811         | 16.0%           |

**Table S2.** The 21 screening hits predicted as 5-HT<sub>1A</sub> binders as a result of mining the TimTec GPCR targeted library.

| Structure                                                                          | Serial No. | TimTec ID | <i>k</i> -Nearest Neighbor prediction score | Random Forest prediction score | Support Vector Machines prediction score | Percent of inhibition | Exp. IC <sub>50</sub> (nM) <sup>a</sup> |
|------------------------------------------------------------------------------------|------------|-----------|---------------------------------------------|--------------------------------|------------------------------------------|-----------------------|-----------------------------------------|
| 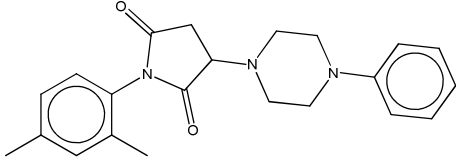  | 1          | ST007335  | 1.08                                        | 1.30                           | 1.00                                     | ND <sup>c</sup>       | ND                                      |
|   | 2          | ST007839  | 1.08                                        | 1.17                           | 1.06                                     | ND                    | ND                                      |
|   | 3          | ST007188  | 1.10                                        | 1.27                           | 1.00                                     | ND                    | ND                                      |
|  | 4          | ST039362  | 1.08                                        | 1.33                           | 1.00                                     | ND                    | ND                                      |

|                                                                                     |   |          |      |      |      |                   |    |
|-------------------------------------------------------------------------------------|---|----------|------|------|------|-------------------|----|
| 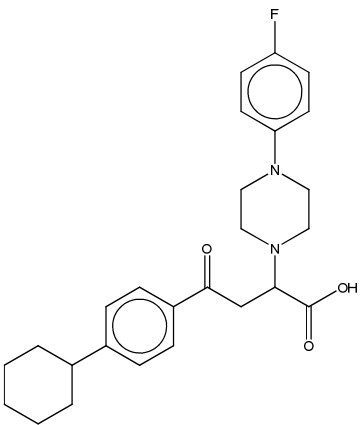   | 5 | ST007484 | 1.04 | 1.12 | 1.00 | ND                | ND |
|    | 6 | ST016950 | 1.07 | 1.10 | 1.00 | 5.5% <sup>a</sup> | ND |
|   | 7 | ST014829 | 1.06 | 1.27 | 1.00 | 39.20%            | ND |
|  | 8 | ST007472 | 1.03 | 1.09 | 1.00 | 21.80%            | ND |

|                                                                                     |    |          |      |      |      |    |    |
|-------------------------------------------------------------------------------------|----|----------|------|------|------|----|----|
| 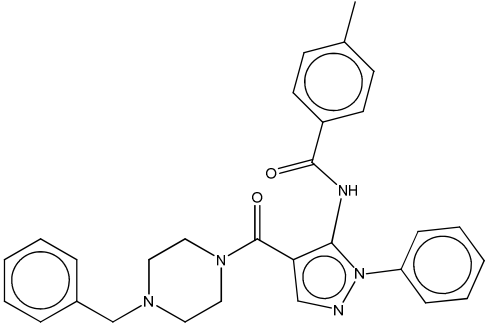   | 9  | ST015321 | 1.07 | 1.17 | 1.00 | ND | ND |
|    | 10 | ST016028 | 1.08 | 1.15 | 1.00 | ND | ND |
|   | 11 | ST024768 | 1.05 | 1.20 | 1.00 | ND | ND |
|  | 12 | ST038835 | 1.07 | 1.12 | 1.00 | ND | ND |

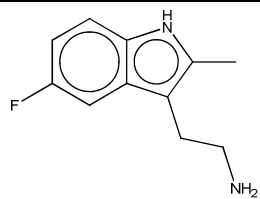

13

ST038838

1.03

1.10

1.00

ND

ND

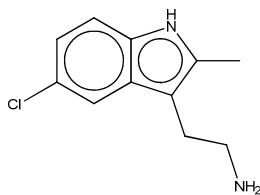

14

ST037879

1.09

1.15

1.00

ND

ND

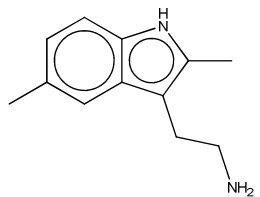

15

ST039394

1.09

1.07

1.00

ND

ND

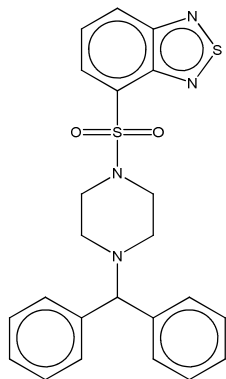

16

ST044960

1.05

1.27

1.00

ND

ND

|                                                                                    |    |          |      |      |      |        |                    |
|------------------------------------------------------------------------------------|----|----------|------|------|------|--------|--------------------|
| 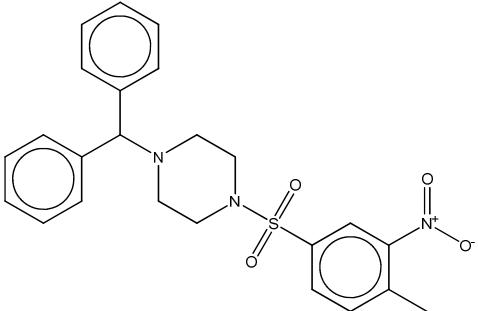  | 17 | ST024676 | 1.09 | 1.29 | 1.00 | ND     | ND                 |
|   | 18 | ST055405 | 1.06 | 1.18 | 1.00 | ND     | ND                 |
|  | 19 | ST030580 | 1.02 | 1.09 | 1.00 | 95.50% | 306.0 <sup>b</sup> |

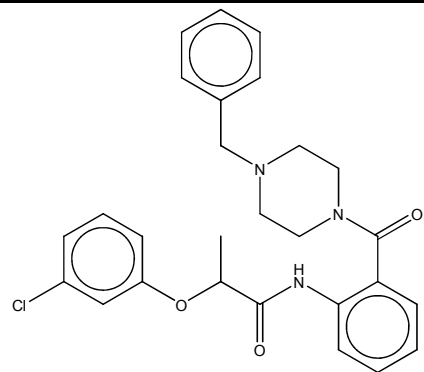

20

ST015856

1.06

1.16

1.00

ND

ND

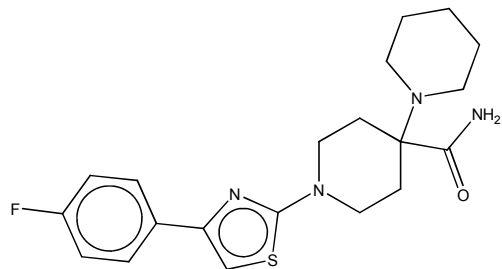

21

ST041900

1.07

1.09

1.00

4.70%

ND

---

<sup>a</sup>: Only five hit compounds were sent to experimental validation upon their structural similarity and the commercial availability.

<sup>b</sup>: The full IC<sub>50</sub> curve was generated in further experiment and the Ki value was determined.

<sup>c</sup>: Not determined.



**Table S3.** The 22 screening hits predicted as 5-HT<sub>1A</sub> binders as a result of mining the TimTec Diversity library.

| Structure                                                                           | Serial No. | TimTec ID | <i>k</i> -Nearest Neighbor prediction score | Random Forest prediction score | Support Vector Machines prediction score | Percent of inhibition | Exp. IC <sub>50</sub> (nM) <sup>a</sup> |
|-------------------------------------------------------------------------------------|------------|-----------|---------------------------------------------|--------------------------------|------------------------------------------|-----------------------|-----------------------------------------|
| 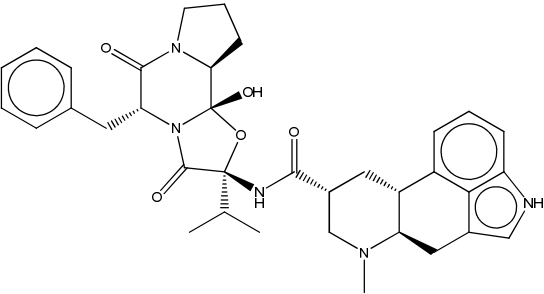   | 22         | ST056345  | 1.01                                        | 1.14                           | 1.00                                     | ND <sup>c</sup>       | ND                                      |
|   | 23         | ST057581  | 1.01                                        | 1.14                           | 1.00                                     | ND                    | ND                                      |
|  | 24         | ST057158  | 1.01                                        | 1.03                           | 1.00                                     | ND                    | ND                                      |

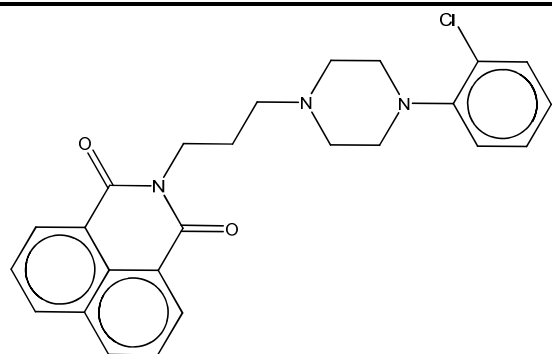

25

ST023860

1.02

1.12

1.00

95.60%<sup>a</sup>159.0<sup>b</sup>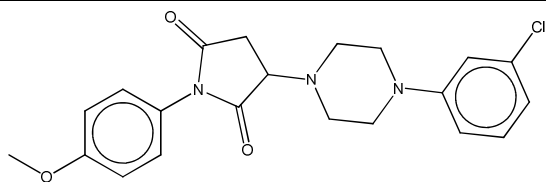

26

ST007110

1.08

1.14

1.06

11.10%

ND

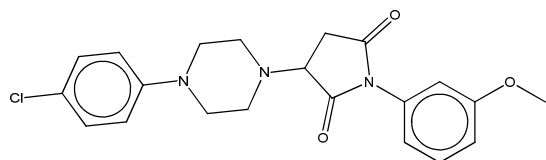

27

ST007188

1.10

1.27

1.06

ND

ND

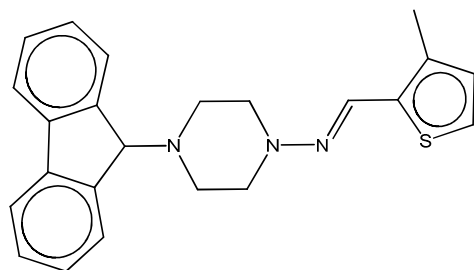

28

ST041338

1.03

1.22

1.00

ND

ND

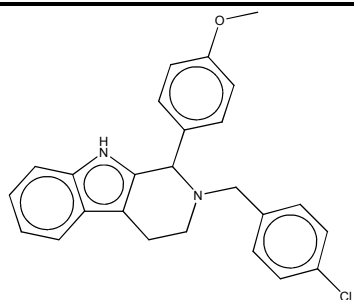

29

ST074312

1.06

1.20

1.00

ND

ND

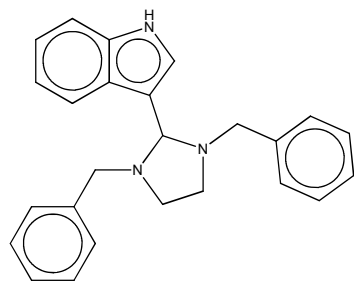

30

ST055328

1.08

1.43

1.00

ND

ND

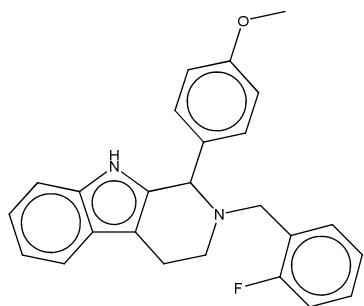

31

ST074310

1.09

1.18

1.00

ND

ND

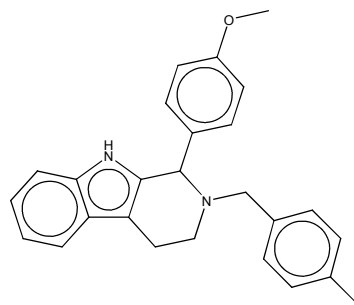

32

ST074317

1.09

1.14

1.00

ND

ND

|                                                                                     |    |          |      |      |      |        |        |
|-------------------------------------------------------------------------------------|----|----------|------|------|------|--------|--------|
| 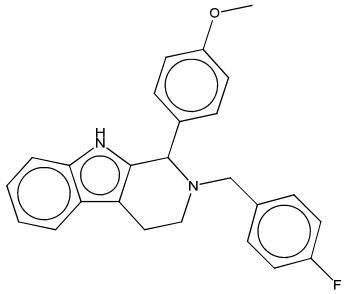   | 33 | ST074308 | 1.10 | 1.15 | 1.00 | ND     | ND     |
|    | 34 | ST074311 | 1.10 | 1.14 | 1.00 | 70.80% | 8194.0 |
|   | 35 | ST073803 | 1.03 | 1.22 | 1.00 | ND     | ND     |
|  | 36 | ST044960 | 1.05 | 1.28 | 1.00 | ND     | ND     |

|                                                                                     |    |          |      |      |      |    |    |
|-------------------------------------------------------------------------------------|----|----------|------|------|------|----|----|
| 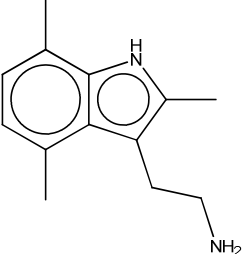   | 37 | ST038832 | 1.06 | 1.12 | 1.00 | ND | ND |
|    | 38 | ST038835 | 1.07 | 1.12 | 1.00 | ND | ND |
|   | 39 | ST037883 | 1.08 | 1.16 | 1.00 | ND | ND |
|  | 40 | ST072504 | 1.09 | 1.20 | 1.00 | ND | ND |

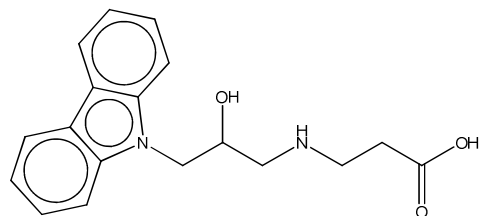

41 ST072476 1.09 1.33 1.00 ND ND

---

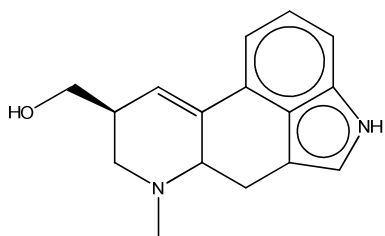

42 ST057540 1.05 1.14 1.00 98.20% 2.3

---

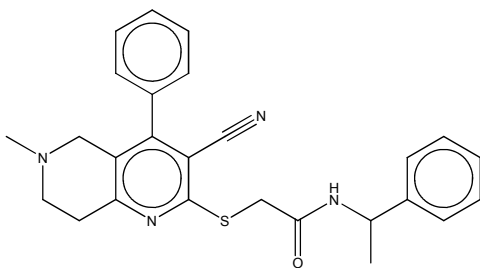

43 ST066677 1.06 1.13 1.00 50.0% ND

---

<sup>a</sup>: Only five hit compounds were sent to experimental validation upon their structural similarity and the commercial availability.

<sup>b</sup>: The full IC<sub>50</sub> curve was generated in further experiment and the Ki value was determined.

<sup>c</sup>: Not determined.

**Table S4.** The 105 5-HT<sub>1A</sub> actives from the PDSP database employed in the QSAR modeling studies.

| Cmpds ID | PDSP ID | SMILES                                                                                                 |
|----------|---------|--------------------------------------------------------------------------------------------------------|
| 1        | 3333    | <chem>CC(CC1=CC=CC=C1)N</chem>                                                                         |
| 2        | 3334    | <chem>C=CCN1CCC2=C(C(=C(C=C2C(C1)C3=CC=CC=C3)O)O)Cl</chem>                                             |
| 3        | 3336    | <chem>CC(C)CC1C(=O)N2CCCC2C3(N1C(=O)C(O3))(C(C)C)NC(=O)C4CN(C5CC6=C(NC7=CC=CC(=C67)C5=C4)Br)C)O</chem> |
| 4        | 3338    | <chem>CN1CCN(CC1)C2=NC3=C(C=CC(=C3)C(F)(F)F)N4C2=CC=C4.C(=CC(=O)O)C(=O)O</chem>                        |
| 5        | 3342    | <chem>CN1CCC(=C2C3=CC=CC=C3C=CC4=CC=CC=C42)CC1</chem>                                                  |
| 6        | 3345    | <chem>CC1(C(=O)N2C(C(=O)N3CCCC3C2(O1)O)CC4=CC=CC=C4)NC(=O)C5CC6C(CC7=CNC8=CC=CC6=C78)N(C5)C</chem>     |
| 7        | 3347    | <chem>C1=CC(=C(C=C1CCN)O)O</chem>                                                                      |
| 8        | 3349    | <chem>CCC1=CC(=C(C(=C1O)C(=O)NCC2CCCN2CC)OC)Cl</chem>                                                  |
| 9        | 3350    | <chem>C1CN(CCN1CCC=C2C3=CC=CC=C3SC4=C2C=C(C=C4)C(F)(F)F)CCO</chem>                                     |
| 10       | 3351    | <chem>CCCCCCC(=O)OCCN1CCN(CC1)CCCN2C3=CC=CC=C3SC4=C2C=C(C=C4)C(F)(F)F</chem>                           |
| 11       | 3352    | <chem>C1CN(CCN1CCCC2=CC=CC=C2)CCOC(C3=CC=C(C=C3)F)C4=CC=C(C=C4)F</chem>                                |
| 12       | 3354    | <chem>C1CN(CCC1(C2=CC=C(C=C2)Cl)O)CCCC(=O)C3=CC=C(C=C3)F</chem>                                        |
| 13       | 3357    | <chem>C1CN=C(N1)C2COC3=CC=CC=C3O2</chem>                                                               |
| 14       | 3364    | <chem>CC1=C(C2=C(N1)C=CC(=C2)O)CCN</chem>                                                              |
| 15       | 3367    | <chem>CN1CCN2C(C1)C3=CC=CC=C3CC4=CC=CC=C42</chem>                                                      |
| 16       | 3369    | <chem>CN1CC(C2=C(C1)C(=CC=C2)N)C3=CC=CC=C3</chem>                                                      |
| 17       | 3371    | <chem>CC1=CC=C(C=C1)N(CC2=NCCN2)C3=CC(=CC=C3)O.CS(=O)(=O)O</chem>                                      |
| 18       | 3372    | <chem>C1CN(CCC1N2C3=CC=CC=C3NC2=O)CCCC(C4=CC=C(C=C4)F)C5=CC=C(C=C5)F</chem>                            |
| 19       | 3373    | <chem>CCCN1CCCC(C1)C2=CC(=CC=C2)O</chem>                                                               |
| 20       | 3374    | <chem>CC(C)NCC(COC1=CC=CC2=CC=CC=C21)O</chem>                                                          |

21 3375 CCCN1CCCC2C1CC3=C(C2)NN=C3

22 3377 COC1C(CC2CN3CCC4=C(C3CC2C1C(=O)OC)NC5=C4C=CC(=C5)OC)OC(=O)C6=CC(=C(C(=C6)OC)OC)OC

23 3378 CC1=C(C(=O)N2C=CSC2=N1)CCN3CCC(=C(C4=CC=C(C=C4)F)C5=CC=C(C=C5)F)CC3

24 3379 CN1CCC2=CC(=C(C=C2C(C1)C3=CC=CC=C3)O)Cl

25 3381 C1CNCC(C2=CC(=C(C=C21)O)O)C3=CC=CC=C3

26 3382 C=CCN1CCC2=CC(=C(C=C2C(C1)C3=CC=CC=C3)O)O

27 3383 C1CNCC(C2=CC(=C(C=C21)Cl)O)O)C3=CC=CC=C3

28 3386 C1C(C1N)C2=CC=CC=C2

29 3387 CC1C(CCN1CC2=CC=CC=C2)NC(=O)C3=CC(=C(C=C3OC)NC)Cl

30 6981 CCCN(CCC)C1CCC2=C(C1)C=C(C=C2)O

31 6984 CC(C)(C)NCC(COC1=CC=CC2=C1SCCC2)O

32 11304 CC1=C(C(=O)N2CCCC(C2=N1)O)CCN3CCC(CC3)C4=NOC5=C4C=CC(=C5)F

33 11306 C1CCN(CC1)C2(CCN(CC2)CCCC(=O)C3=CC=C(C=C3)F)C(=O)N

34 11307 C1CN(CCC12C(=O)NCN2C3=CC=CC=C3)CCCC(C4=CC=C(C=C4)F)C5=CC=C(C=C5)F

35 11310 CC1=CC2=C(NC3=CC=CC=C3N=C2S1)N4CCN(CC4)C

36 11311 C1CN(CCN1CCOCCO)C2=NC3=CC=CC=C3SC4=CC=CC=C42

37 11312 CN1CC2C(C1)C3=C(C=CC(=C3)Cl)OC4=CC=CC=C24

38 11313 C1CN(CCC1C2=CN(C3=C2C=C(C=C3)Cl)C4=CC=C(C=C4)F)CCN5CCNC5=O

39 11314 C1CN(CCN1CCC2=C(C=C3C(=C2)CC(=O)N3)Cl)C4=NSC5=CC=CC=C54

40 11490 C1CN(CCC12C(=O)NCN2C3=CC=CC=C3)CC4COC5=CC=CC=C5O4

41 11861 CCCN(CCC)C1CCC2=C(C1)C(=CC=C2)O

42 11862 COC(=O)C1C(CCC2C1CC3C4=C(CCN3C2)C5=CC=CC=C5N4)O



43 11863 C1C2C(CN1)OC3=C(O2)C=CC=C3F

44 11912 CC1=C(C=CC(=C1)C2=NOC(=N2)C)C3=CC=C(C=C3)C(=O)NC4=CC(=C(C=C4)O)C)N5CCN(CC5)C

45 11913 CC1=C(C=CC(=C1)C2=NOC(=N2)C)C3=CC=C(C=C3)C(=O)NC4=CC(=C(C=C4)O)C)OCCN(C)C

46 14602 C1CC(CCC1CCN2CCC3=C(C2)C=CC(=C3)C#N)NC(=O)C4=CC=NC5=CC=CC=C45

47 15233 C1CN(CCN1CCCCN2C(=O)C3=CC=CC=C3S2(=O)=O)C4=NC=CC=N4.Cl

48 15237 CN1CC(CC2C1CC3=CN(C4=CC=CC2=C34)C)NS(=O)(=O)N(C)C

49 15238 C1CN(CCC1C(=O)C2=CC=C(C=C2)F)CCN3C(=O)C4=CC=CC=C4NC3=O

50 15245 C1=CC2=C(C=C1C(=O)N)C(=CN2)CCN

51 15246 COC1=CC=CC=C1N2CCN(CC2)CCCCN3C(=O)C4=CC=CC=C4C3=O.Br

52 15251 C1CN(CCN1CCNC(=O)C2=CC=C(C=C2)F)C3=C4C(=CC=C3)OC(CO4)CO

53 15254 CC(C)NCC(COC1=CC=CC2=C1C=CN2)O

54 15256 CNS(=O)(=O)CC1=CC2=C(C=C1)NC=C2CCN(C)C

55 15975 C1CCC2(C1)CC(=O)N(C(=O)C2)CCCCN3CCN(CC3)C4=NC=CC=N4

56 15982 CC(C)(C)C1(CCN2CC3C4=CC=CC=C4CCC5=C3C(=CC=C5)C2C1)O

57 15983 CN1CCN(CC1)C2CC3=CC=CC=C3SC4=C2C=C(C=C4)SC

58 15985 C1CN(CCC12C(=O)NCN2C3=CC=CC=C3)CCCC(=O)C4=CC=C(C=C4)F

59 16351 C1CN(CCN1)C2=NC3=CC=CC=C3C=C2

60 16353 CC1=CC(=C(C=C1OC)CC(C)N)OC

61 16356 CC1=CC=CN2C1=NC(=C(C2=O)CCN3CCC(CC3)C4=NOC5=C4C=CC(=C5)F)C

62 16358 C1CC2=C(C=CC(=C2)F)OC1C(CNCC(C3CCC4=C(O3)C=CC(=C4)F)O)O

63 16359 CN1C=C(N=C1C2=CC=C(C=C2)OCC(CNCCOC3=CC(=C(C=C3)O)C(=O)N)O)C(F)(F)F

64 16482 CC(CF)NCC(COC1=CC=CC2=C1C3=CC=CC=C3N2)O

65 16571 CN(C)CCC1=CNC2=C1C(=CC=C2)O

66 17031 CC(=O)C1=CC(=C(C=C1)OCCCN2CCC(CC2)C3=NOC4=C3C=CC(=C4)F)OC

67 21889 CCN(CC)C(=O)C1CN(C2CC3=CNC4=CC=CC(=C34)C2=C1)C

68 23627 CC(CN1C2=CC=CC=C2SC3=C1C=C(C=C3)C#N)CN(C)C

69 24816 CN(C)CCCN1C2=CC=CC=C2SC3=C1C=C(C=C3)Cl

70 25006 CN1CCN(CC1)C2=NC3=CC=CC=C3OC4=C2C=C(C=C4)Cl

71 25141 CC1=C(C(=O)N2CCCCC2=N1)CCN3CCC(CC3)C4=NOC5=C4C=CC(=C5)F

72 25270 CN1CCN(CC1)CCC=C2C3=CC=CC=C3SC4=C2C=C(C=C4)S(=O)(=O)N(C)C

73 25326 CN(C)CCOC1=CC2=CC=CC=C2SC3=C1C=C(C=C3)Cl

74 25378 C1CC(=O)NC2=C1C=CC(=C2)OCCCN3CCN(CC3)C4=C(C(=CC=C4)Cl)Cl

75 26890 CCCCCOC1=NSN=C1C2=CCCN(C2)C

76 27135 C1=CC2=C(C=C1O)C(=CN2)CCN

77 27136 CN1C=C(C2=C1C=CC3=C2CCCO3)CCN

78 27142 CC(CC1=CC(=C(C=C1OC)I)OC)N

79 27405 CN1CCC2=CC=CC3=C2C1CC4=C3C(=C(C=C4)O)O

80 27407 CCNC(=O)N(CCCN(C)C)C(=O)C1CC2C(CC3=CNC4=CC=CC2=C34)N(C1)CC=C

81 27408 CCN(CC)C(=O)NC1CN(C2CC3=CNC4=CC=CC(=C34)C2=C1)C

82 27409 CCCN1CC(CC2C1CC3=CNC4=CC=CC2=C34)CSC.CS(=O)(=O)O

83 27410 C1CN(CCN1CC2=CC3=C(C=C2)OCO3)C4=NC=CC=N4

84 27411 CCCNC1CCC2=C(C1)SC(=N2)N

85 27414 CCCN(CCC)CCC1=C2CC(=O)NC2=CC=C1

86 27415 C1CN(CC=C1C2=CC=CC=C2)CCCC3=CNC4=C3C=C(C=C4)O

87 27416 C=CCN1CCC2=C(CC1)SC(=N2)N.Cl.Cl

88 27417 CCN(CC)C(=O)NC1CC2C(CC3=CNC4=CC=CC2=C34)N(C1)C

89 27820 CCCN(CCC)C1CCC2=C(C1)C=CC(=C2)CS(=O)(=O)C3=CC=C(C=C3)OC

90 28099 CCNC(C)CC1=CC(=CC=C1)C(F)(F)F

91 28153 CCC(CO)NC(=O)C1CN(C2CC3=CN(C4=CC=CC(=C34)C2=C1)C)C

92 28315 CC(CC1=CC(=CC=C1)C(F)(F)F)N

93 28369 CC1(C(=O)N2C(C(=O)N3CCCC3C2(O1)O)CC4=CC=CC=C4)NC(=O)C5CN(C6CC7=CNC8=CC=CC(=C78)C6=C5)C

94 28618 CCC1=C(NC2=C1C(=O)C(CC2)CN3CCOCC3)C

95 28620 C1CN(CCN1CCCN2C3=CC=CC=C3SC4=C2C=C(C=C4)Cl)CCO

96 28625 CN1CCCCC1CCN2C3=CC=CC=C3SC4=C2C=C(C=C4)SC

97 28627 CN1CCN(CC1)CCCN2C3=CC=CC=C3SC4=C2C=C(C=C4)C(F)(F)F

98 32488 CCC1=CC2=C(O1)C=CC3=C2N(N=C3)CC(C)N

99 36772 CN1CCN(CC1)C2=C3C=CC=CC3=NC4=C(N2)C=C(C=C4)Cl

100 38854 C1CN(CCC1C(C2=CC=CC=C2)O)CCC3=CC=CC=C3

101 38855 CN(C)CCONC(=CC=C1C=CC(=O)C=C1)C2=CC=CC=C2F.CN(C)CCONC(=CC=C1C=CC(=O)C=C1)C2=CC=CC=C2F.C(=CC(=O)O)C(=O)O

102 39352 CCCN(CCC)CCC1=CNC2=CC=CC=C21

103 41610 C1CN(CCN1)C2=C3C=CC=CC3=NC4=C(N2)C=C(C=C4)Cl

104 47317 COC1=CC=CC=C1N2CCN(CC2)CCN(C3=CC=CC=N3)C(=O)C4CCCCC4.Cl.Cl.Cl

105 48236 COC1=C(C=C2C3CC4=C(CN3CCC2=C1)C(=C(C=C4)O)OC)O

---

**Table S5.** The 61 5-HT<sub>1A</sub> non-actives from the PDSP database employed in the QSAR modeling studies.

| Cmpds ID | PDSP ID | SMILES                                                          |
|----------|---------|-----------------------------------------------------------------|
| 106      | 3337    | <chem>O=C(N)N1c2c(C=Cc3c1cccc3)cccc2</chem>                     |
| 107      | 3340    | <chem>Clc1cc2N(c3c(CCc2cc1)cccc3)CCCN(C)C</chem>                |
| 108      | 3343    | <chem>N(C(Cc1cccc1)C)(CC#C)C</chem>                             |
| 109      | 3344    | <chem>N(CCCN1c2c(CCc3c1cccc3)cccc2)C</chem>                     |
| 110      | 3353    | <chem>O=C1c2c(n(c3c2cccc3)C)CCC1Cn1cnc1C</chem>                 |
| 111      | 3355    | <chem>O(C)c1cc2c3CCN4C5C(CC(CC5CC)C4)c3[nH]c2cc1</chem>         |
| 112      | 3356    | <chem>O(C(=O)c1c2c([nH]c1)cccc2)C1CC2N(C(C1)CC2)C</chem>        |
| 113      | 3358    | <chem>N(CCCN1c2c(CCc3c1cccc3)cccc2)(C)C</chem>                  |
| 114      | 3359    | <chem>Fc1ccc(cc1)C(=O)C1CCN(CC1)CCN1C(=O)c2c(NC1=O)cccc2</chem> |
| 115      | 3360    | <chem>Clc1cc(cc(Cl)c1)C(OC1CC2N(C(C1)CC2)C)=O</chem>            |
| 116      | 3361    | <chem>O1c2cc(ccc2OC1)CC(N)C</chem>                              |
| 117      | 3363    | <chem>N(C(Cc1cccc1)C)C</chem>                                   |
| 118      | 3365    | <chem>O(C(=O)C(C1NCCCC1)c1cccc1)C</chem>                        |
| 119      | 3366    | <chem>Clc1cc(C(=O)NCCN(CC)CC)c(OC)cc1N</chem>                   |
| 120      | 3370    | <chem>Oc1cc(ccc1O)C(O)CN</chem>                                 |
| 121      | 3376    | <chem>n1c2c(ccc1N1CCNCC1)cccc2</chem>                           |
| 122      | 3385    | <chem>S(=O)(=O)(N)c1cc(C(=O)NCC2N(CCC2)CC)c(OC)cc1</chem>       |
| 123      | 3389    | <chem>Br1ccc(cc1)\C(=C\CN(C)C)\c1ccnc1</chem>                   |
| 124      | 16360   | <chem>o1cccc1C(=O)N1CCN(CC1)c1nc(N)c2cc(OC)c(OC)cc2n1</chem>    |
| 125      | 16362   | <chem>O(C)c1ccc(cc1)CN(CCN(C)C)c1ncccc1</chem>                  |

126 16797 O(C)c1ccc(cc1)C(CN(C)C)C1(O)CCCCC1  
 127 16799 Fc1ccc(cc1)C1(OCc2c1ccc(e2)C#N)CCCN(C)C  
 128 16800 O1CCNCC1C(Oc1cccc1OCC)c1cccc1  
 129 22224 O1C(CC2(C3C(CCC2C1=O)(C)C(CC(OC(=O)C)C3=O)C(OC)=O)C)c1ccoc1  
 130 23143 SCCC(N)C(O)=O  
 131 23144 SCC(N)C(O)=O  
 132 23146 S1CCC(N)C1=O  
 133 23149 S(O)(=O)CC(N)C(O)=O  
 134 23150 S(O)(=O)(=O)CCC(N)C(O)=O  
 135 23153 S(O)(=O)(=O)CC(N)C(O)=O  
 136 23154 S(SCC(N)C(O)=O)CC(N)C(O)=O  
 137 23157 S(CCC(N)C(O)=O)C  
 138 25643 O(C(=O)c1cccc1)C1CC2N(C(CC2)C1C(OC)=O)C  
 139 25815 OC(C(NC)C)c1cccc1  
 140 25970 OC(C(N)C)c1cccc1  
 141 26038 O=C(C(N)C)c1cccc1  
 142 26069 O=C(C(NC)C)c1cccc1  
 143 26728 Oc1c2c3c(c4c5c(C(=O)c6c7c(c8c(c(C2=O)c(O)cc8O)c3c57)c(O)cc6O)c(O)cc4C)c(c1)CO  
 144 26730 OC=1C2(CC(C\C=C(\C)/C)C(CC\C=C(\C)/C)(C)C(C(=O)C(C)C)(C2=O)C(=O)C=1C\C=C(\C)/C)C\C=C(\C)/C  
 145 26731 O1C(CO)C(O)C(O)C(O)C1OC1=C(OC=2C(=C1O)C(O)=CC(=O)C=2)c1cc(O)c(O)c1  
 146 26732 O1C(CO)C(O)C(O)C(O)C1OC1=C(OC=2C(=C1O)C(O)=CC(=O)C=2)c1cc(O)c(O)c1  
 147 26733 O1C(COC2OC(C)C(O)C(O)C2O)C(O)C(O)C(O)C1OC1=C(Oc2c(C1=O)c(O)cc(O)c2)c1cc(O)c(O)cc1

148 26734 O1c2c(C(=O)C(O)=C1c1cc(O)c(O)cc1)c(O)cc(O)c2  
 149 26735 O1C(C)C(O)C(O)C(O)C1OC1=C(OC=2C(=C1O)C(O)=CC(=O)C=2)c1cc(O)c(O)cc1  
 150 26736 O1c2c(C(=O)C=C1c1ccc(O)cc1)c(O)cc(O)c2-c1cc(ccc1O)C=1Oc2c(C(=O)C=1)c(O)cc(O)c2  
 151 27412 n1c2CC3C(N(CCC3)CCC)Cc2enc1N  
 152 27666 O1c2cc(ccc2OC1)CC(NC)C  
 153 31276 Fc1ccc(cc1)CCN1CCC(CC1)C(O)c1cccc(OC)c1OC  
 154 33211 Clc1cccc(Cl)c1Nc1cccc1CC(=O)[O-]  
 155 33247 S(=O)(=O)(Nc1ccc([N+](=O)[O-])cc1Oc1cccc1)C  
 156 33287 O(C(=O)C)c1cccc1C(O)=O  
 157 33323 S1(=O)(=O)N(C)\C(=C(/O)\Nc2ncccc2)\C(=O)c2c1cccc2  
 158 33400 OC(=O)C(C)c1ccc(cc1)CC(C)C  
 159 33516 O(C)c1cc2c(cc(cc2)C(C(O)=O)C)cc1  
 160 33556 S(=O)(=O)(N)c1ccc(-n2nc(cc2-c2ccc(cc2)C)C(F)(F)F)cc1  
 161 33595 Clc1cc(c(nc1)-c1ccc(nc1)C)-c1ccc(S(=O)(=O)C)cc1  
 162 33631 S(=O)(=O)(NC(=O)CC)c1ccc(cc1)-c1c(noc1C)-c1cccc1  
 163 33671 S(=O)(=O)(C)c1ccc(cc1)C=1COC(=O)C=1c1cccc1  
 164 33708 S(=O)(=O)(N)c1ccc(cc1)-c1c(noc1C)-c1cccc1  
 165 33745 Clc1ccc(cc1)C(=O)n1c2c(cc(OC)cc2)c(CC(=O)NCCc2ccc(NC(=O)C)cc2)c1C  
 166 48248 O(c1cccc1N(Cc1cccc1OC)C(=O)C)c1cccc1

---

**Table S6.** The 66 5-HT<sub>1A</sub> actives used as the independent validation set (extracted from WOMBAT).

| Cmpds ID | WOMBAT ID | SMILES                                                                       |
|----------|-----------|------------------------------------------------------------------------------|
| 1        | 552       | <chem>O1c2c(OCC1)cccc2OCCN1CCC(=CC1)c1c2c([nH]c1)cccc2</chem>                |
| 2        | 553       | <chem>Fc1cc2c([nH]cc2C=2CCN(CC=2)CCOc2c3OCCOc3ccc2)cc1</chem>                |
| 3        | 554       | <chem>Fc1cc2[nH]cc(c2cc1)C=1CCN(CC=1)CCOc1c2OCCOc2ccc1</chem>                |
| 4        | 555       | <chem>Fc1cc2c([nH]cc2CC2CCN(CC2)CCOc2c3OCCOc3ccc2)cc1</chem>                 |
| 5        | 556       | <chem>Fc1cc2[nH]cc(c2cc1)C1CCN(CC1)CCOc1c2OCCOc2ccc1</chem>                  |
| 6        | 557       | <chem>O1c2c(OCC1)cccc2OCCN1CCC(=CC1)c1c2cccnc2[nH]c1</chem>                  |
| 7        | 558       | <chem>O(CCN1CCC(=CC1)c1c2c([nH]c1)cccc2)c1c2c([nH]cc2)ccc1</chem>            |
| 8        | 559       | <chem>O(CCN1CCC(=CC1)c1c2cccnc2[nH]c1)c1c2c([nH]cc2)ccc1</chem>              |
| 9        | 560       | <chem>O(CCN1CCC(=CC1)c1c2c([nH]c1)cccc2)c1c2c(nccc2)ccc1</chem>              |
| 10       | 561       | <chem>O(CCN1CCC(=CC1)c1c2cccnc2[nH]c1)c1c2c(nccc2)ccc1</chem>                |
| 11       | 2800      | <chem>Clc1cc2c(sc(S(=O)(=O)Nc3cc(N4CCNCC4)c(OC)cc3)c2C)cc1</chem>            |
| 12       | 2801      | <chem>Clc1cc2c(sc(S(=O)(=O)Nc3cc(N4CCN(CC4)C)c(OC)cc3)c2C)cc1</chem>         |
| 13       | 2802      | <chem>Clc1cc2c(sc(S(=O)(=O)Nc3cc(N4CC5N(CCCC5)CC4)c(OC)cc3)c2C)cc1</chem>    |
| 14       | 2804      | <chem>Clc1cc2c(sc(S(=O)(=O)Nc3cc(N4CCN5[C@H](CCC5)C4)c(OC)cc3)c2C)cc1</chem> |
| 15       | 28425     | <chem>O(C)c1cc2c([nH]cc2CCN)cc1</chem>                                       |
| 16       | 28426     | <chem>O(CCC)c1cc2c([nH]cc2CCN)cc1</chem>                                     |
| 17       | 28427     | <chem>O(CCCCC)c1cc2c([nH]cc2CCN)cc1</chem>                                   |
| 18       | 28428     | <chem>O(CCCCCC)c1cc2c([nH]cc2CCN)cc1</chem>                                  |
| 19       | 28429     | <chem>O(CCCCCC)c1cc2c([nH]cc2CCN)cc1</chem>                                  |
| 20       | 28430     | <chem>O(CCCCCCCC)c1cc2c([nH]cc2CCN)cc1</chem>                                |

21 28431 O(CCCCCCCCC)c1cc2c([nH]cc2CCN)cc1  
 22 28432 O(CCCCCCCCC)c1cc2c([nH]cc2CCN)cc1  
 23 28434 O(CCCCCC(C)C)c1cc2c([nH]cc2CCN)cc1  
 24 28435 O(CCCCCC(C)(C)C)c1cc2c([nH]cc2CCN)cc1  
 25 28436 O(CCCCCC(C)(C)C)c1cc2c([nH]cc2CCN)cc1  
 26 28437 O(CCCCC1CCCC1)c1cc2c([nH]cc2CCN)cc1  
 27 28438 O(CCCCCCCCC)c1cc2c([nH]cc2CCN(C)C)cc1  
 28 28439 O(CCCCCCCCC)c1cc2c([nH]cc2CCNCCCC)cc1  
 29 28443 [nH]1cc(e2cc(ccc12)CC)CCN  
 30 28444 [nH]1cc(e2cc(ccc12)CC)CCN(C)C  
 31 28445 [nH]1cc(e2cc(ccc12)CCCCCCCC)CCN  
 32 28446 O=C(C)c1cc2c([nH]cc2CCN)cc1  
 33 28448 O(C(=O)CC)c1cc2c([nH]cc2CCN(C)C)cc1  
 34 28451 O(C(=O)CCCCCCCC)c1cc2c([nH]cc2CCN(C)C)cc1  
 35 34398 S(Oc1cc2c([nH]cc2CCN(CCC)CCC)cc1)(=O)(=O)C(F)(F)F  
 36 34399 S(Oc1cc2c([nH]cc2CCN(CC)CC)cc1)(=O)(=O)C(F)(F)F  
 37 34400 S(Oc1cc2c([nH]cc2CCN(C)C)cc1)(=O)(=O)C(F)(F)F  
 38 34401 S(Oc1cc2c([nH]cc2CCN)cc1)(=O)(=O)C(F)(F)F  
 39 34402 O(C)c1ccc(cc1)CNC(=O)\C=C\c1cc2c([nH]cc2CCN(C)C)cc1  
 40 44145 O1CCc2c(ccc2)C1CCN1CCN(CC1)c1ccc(OC)cc1  
 41 44146 O1CCc2cc(ccc2[C@@H]1CCN1CCN(CC1)c1ccc(OC)cc1)C(=O)N  
 42 44148 O1CCc2cc(ccc2[C@@H]1CCN1CCN(CC1)c1ccc(OC)cc1)C(=O)NC



43 49513 Brc1ccc(S(=O)(=O)Nc2cc(N3CCN(CC3)C)c(OC)cc2)cc1

44 49956 O=C1Nc2c3c(CCCC13CCCN1CCC(=CC1)c1cccc1)ccc2

45 52802 O1c2c(OCC1CNCCOc1c(OC)cccc1OC)cccc2

46 52803 O1c2c(cccc2)C(=O)[C@@H](CNCCOc2c(OC)cccc2OC)[C@@H]1c1cccc1

47 52804 S1c2c(cccc2)C(=O)[C@@H](CNCCOc2c(OC)cccc2OC)[C@@H]1c1cccc1

48 52805 O(CCNC[C@H]1[C@@H](Cc2c(cccc2)C1=O)c1cccc1)c1c(OC)cccc1OC

49 52807 O1c2c(C[C@H]([C@@H]1CNCCOc1c(OC)cccc1OC)c1cccc1)cccc2

50 52808 O1c2c(C=C(CNCCOc3c(OC)cccc3OC)C1c1cccc1)cccc2

51 52809 O(CCNCOCc1cccc1OCc1cccc1)c1c(OC)cccc1OC

52 52810 O(C)c1cccc1N1CCN(CC1)CCN1C(=O)CC2(CC1=O)CCCC2

53 54082 O1c2c(OCC1CN[C@@H]1CC[C@@H](Oc3cccc3OC)[C@@H]1O)cccc2

54 54084 O1c2c(OCC1CN[C@@H]1CC[C@@H](Oc3c(OC)cccc3OC)[C@@H]1O)cccc2

55 56453 S(=O)(=O)(N1CCCC[C@@H]1CCN1CCC(CC1)C)c1c2c(ccc1)cccc2

56 56455 S(=O)(=O)(N1CCC[C@@H]1CCN1CCC(CC1)C)c1c2c(ccc1)cccc2

57 56457 Clc1cc(S(=O)(=O)N2CCC[C@@H]2CCN2CCC(CC2)C)ccc1Cl

58 56458 Brc1cc(S(=O)(=O)N2CCC[C@@H]2CCN2CCC(CC2)C)ccc1

59 56459 S(=O)(=O)(N1CCC[C@@H]1CCN1CCC(CC1)C)c1cc(ccc1)C

60 57927 N1([C@@H]2Cc3c4-c5c(Cc4ccc3)ccc(CC1)c25)C

61 57933 O=C(N[C@@H]1c2c3-c4c1ccc1CCN([C@H](Cc3ccc2)c14)C)C

62 57936 N[C@H]1c2c3-c4c1ccc1CCN([C@H](Cc3ccc2)c14)C

63 57937 N1([C@@H]2Cc3c-4c(ccc3)[C@H](c3c-4c2c(CC1)cc3)C)C

|    |       |                                                                  |
|----|-------|------------------------------------------------------------------|
| 64 | 57940 | <chem>O(C)[C@]1(c2c3-c4c1ccc1CCN([C@H](Cc3ccc2)c14)C)C</chem>    |
| 65 | 57941 | <chem>O(CC)[C@@]1(c2c3-c4c1ccc1CCN([C@H](Cc3ccc2)c14)C)CC</chem> |
| 66 | 57947 | <chem>Fc1c2c(C[C@@H](N(CCC)CCC)CC2)c(O)cc1</chem>                |

---

Certificate of Analysis for compound Lysergol

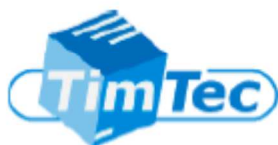

TimTec Corporation  
Harmony Business Park, Bldg 301-A,  
Newark DE 19711, USA  
Phone: 1-302-292-8500 Fax: 1-302-292-8520  
<http://www.timtec.net> e-mail [info@timtec.net](mailto:info@timtec.net)

**Certificate of Analysis**

**Product Name** Lysergol  
**IDNUMBER** ST057540

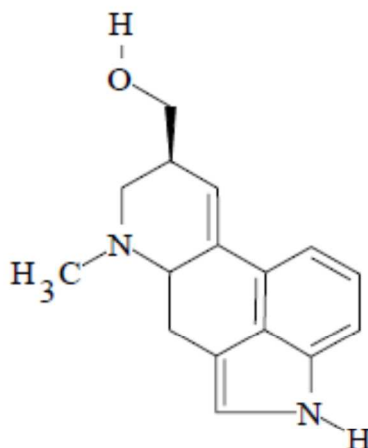

**CAS Registry Number** 602-85-7  
**Molecular Formula** C<sub>16</sub>H<sub>18</sub>N<sub>2</sub>O  
**Molecular Weight** 254.36  
**Original Storage Container** Screw top vial  
**Storage temperature** Ambient  
**Transportation Temperature** Ambient  
**PURITY** >96%
